# Supplementary material for: Comparative Analysis of Carbohydrates, Nucleosides and Amino Acids in Different Parts of Trichosanthes kirilowii Maxim. by (Ultra) High-Performance Liquid Chromatography Coupled with Tandem Mass Spectrometry and Evaporative Light Scattering Detector Methods
Source: PubMed Central journal article supplement (PMC6479868; doi:10.3390/molecules24071440), 2019-04-11
Supplement: molecules-24-01440-s001.pdf [file molecules-24-01440-s001.pdf]

**Table S1.** Contents ( $\mu\text{g/g}$ ) of investigated compounds in nine parts of different cultivars of *T. kirilowii* (n=3)

| Samples      | Analytes (mg/g) |        |        |        |        |        |        |        |        |        |        |        |        |        | TN     |
|--------------|-----------------|--------|--------|--------|--------|--------|--------|--------|--------|--------|--------|--------|--------|--------|--------|
|              | 1               | 2      | 3      | 4      | 5      | 6      | 7      | 8      | 9      | 10     | 11     | 12     | 13     | 14     |        |
| <b>A(S1)</b> | 0.0011          | 0.0005 | 0.1558 | 0.3852 | 0.0000 | 0.0000 | 0.0016 | 0.0005 | 0.0001 | 0.0019 | 0.0004 | 0.0001 | 0.0433 | 0.0001 | 0.5907 |
| <b>A(S2)</b> | 0.0008          | 0.0002 | 0.0738 | 0.2179 | 0.0000 | 0.0000 | 0.0004 | 0.0001 | 0.0001 | 0.0008 | 0.0002 | 0.0001 | 0.0527 | 0.0002 | 0.3472 |
| <b>A(S3)</b> | 0.0006          | 0.0002 | 0.1012 | 0.2093 | 0.0000 | 0.0000 | 0.0009 | 0.0002 | 0.0001 | 0.0012 | 0.0002 | 0.0001 | 0.0889 | 0.0005 | 0.4035 |
| <b>A(S4)</b> | 0.0008          | 0.0004 | 0.1074 | 0.3088 | 0.0000 | 0.0000 | 0.0005 | 0.0003 | 0.0001 | 0.0020 | 0.0004 | 0.0000 | 0.0755 | 0.0000 | 0.4960 |
| <b>A(S5)</b> | 0.0016          | 0.0008 | 0.1156 | 0.2934 | 0.0000 | 0.0000 | 0.0014 | 0.0002 | 0.0001 | 0.0018 | 0.0006 | 0.0000 | 0.1054 | 0.0002 | 0.5212 |
| <b>A(S6)</b> | 0.0018          | 0.0008 | 0.1210 | 0.3298 | 0.0000 | 0.0000 | 0.0002 | 0.0004 | 0.0001 | 0.0020 | 0.0006 | 0.0002 | 0.1473 | 0.0008 | 0.6051 |
| <b>A(S7)</b> | 0.0016          | 0.0005 | 0.1634 | 0.4264 | 0.0000 | 0.0000 | 0.0017 | 0.0008 | 0.0001 | 0.0018 | 0.0006 | 0.0001 | 0.0430 | 0.0002 | 0.6402 |
| <b>B(S1)</b> | 0.0013          | 0.0004 | 0.1772 | 0.5111 | 0.0000 | 0.0000 | 0.0037 | 0.0002 | 0.0001 | 0.0022 | 0.0004 | 0.0002 | 0.0875 | 0.0001 | 0.7843 |
| <b>B(S2)</b> | 0.0012          | 0.0005 | 0.1381 | 0.2168 | 0.0000 | 0.0000 | 0.0028 | 0.0001 | 0.0001 | 0.0023 | 0.0003 | 0.0001 | 0.0758 | 0.0002 | 0.4384 |
| <b>B(S3)</b> | 0.0008          | 0.0003 | 0.1237 | 0.2772 | 0.0000 | 0.0000 | 0.0021 | 0.0000 | 0.0001 | 0.0045 | 0.0002 | 0.0000 | 0.1225 | 0.0000 | 0.5314 |
| <b>B(S4)</b> | 0.0012          | 0.0004 | 0.1604 | 0.3750 | 0.0000 | 0.0000 | 0.0045 | 0.0002 | 0.0001 | 0.0027 | 0.0005 | 0.0001 | 0.1137 | 0.0001 | 0.6590 |
| <b>B(S5)</b> | 0.0017          | 0.0008 | 0.1659 | 0.3559 | 0.0000 | 0.0000 | 0.0043 | 0.0001 | 0.0001 | 0.0027 | 0.0005 | 0.0000 | 0.0853 | 0.0000 | 0.6172 |
| <b>B(S6)</b> | 0.0008          | 0.0004 | 0.1362 | 0.2974 | 0.0000 | 0.0000 | 0.0005 | 0.0001 | 0.0001 | 0.0014 | 0.0002 | 0.0001 | 0.1860 | 0.0004 | 0.6235 |
| <b>B(S7)</b> | 0.0024          | 0.0010 | 0.1953 | 0.5526 | 0.0000 | 0.0000 | 0.0035 | 0.0009 | 0.0001 | 0.0045 | 0.0009 | 0.0001 | 0.0557 | 0.0002 | 0.8171 |
| <b>C(S1)</b> | 0.0145          | 0.0065 | 0.2343 | 0.9227 | 0.0000 | 0.0000 | 0.0053 | 0.0016 | 0.0002 | 0.0097 | 0.0059 | 0.0001 | 0.2180 | 0.0000 | 1.4188 |
| <b>C(S2)</b> | 0.0157          | 0.0062 | 0.1774 | 0.7284 | 0.0000 | 0.0001 | 0.0105 | 0.0022 | 0.0009 | 0.0079 | 0.0063 | 0.0001 | 0.1954 | 0.0000 | 1.1511 |
| <b>C(S3)</b> | 0.0076          | 0.0037 | 0.1968 | 0.6865 | 0.0000 | 0.0000 | 0.0062 | 0.0015 | 0.0002 | 0.0088 | 0.0037 | 0.0000 | 0.2047 | 0.0000 | 1.1197 |
| <b>C(S4)</b> | 0.0124          | 0.0051 | 0.1938 | 0.9264 | 0.0000 | 0.0000 | 0.0135 | 0.0017 | 0.0002 | 0.0171 | 0.0060 | 0.0000 | 0.1938 | 0.0000 | 1.3700 |
| <b>C(S5)</b> | 0.0147          | 0.0055 | 0.2006 | 0.6471 | 0.0000 | 0.0000 | 0.0087 | 0.0012 | 0.0002 | 0.0096 | 0.0055 | 0.0000 | 0.2063 | 0.0000 | 1.0994 |
| <b>C(S6)</b> | 0.0131          | 0.0051 | 0.2297 | 0.7212 | 0.0000 | 0.0000 | 0.0042 | 0.0010 | 0.0001 | 0.0088 | 0.0054 | 0.0000 | 0.2410 | 0.0001 | 1.2298 |
| <b>C(S7)</b> | 0.0120          | 0.0048 | 0.2428 | 1.0342 | 0.0000 | 0.0000 | 0.0063 | 0.0073 | 0.0004 | 0.0101 | 0.0064 | 0.0000 | 0.0730 | 0.0000 | 1.3974 |
| <b>D(S1)</b> | 0.0024          | 0.0012 | 0.1639 | 0.2537 | 0.0000 | 0.0000 | 0.0220 | 0.0008 | 0.0001 | 0.0175 | 0.0005 | 0.0001 | 0.0570 | 0.0043 | 0.5235 |
| <b>D(S2)</b> | 0.0010          | 0.0004 | 0.1359 | 0.1607 | 0.0000 | 0.0000 | 0.0041 | 0.0000 | 0.0000 | 0.0020 | 0.0003 | 0.0000 | 0.0396 | 0.0019 | 0.3460 |

|              |        |        |        |        |        |        |        |        |        |        |        |        |        |        |        |
|--------------|--------|--------|--------|--------|--------|--------|--------|--------|--------|--------|--------|--------|--------|--------|--------|
| <b>D(S3)</b> | 0.0005 | 0.0003 | 0.1237 | 0.1160 | 0.0000 | 0.0000 | 0.0032 | 0.0000 | 0.0001 | 0.0023 | 0.0002 | 0.0000 | 0.1315 | 0.0036 | 0.3813 |
| <b>D(S4)</b> | 0.0021 | 0.0009 | 0.1442 | 0.4035 | 0.0000 | 0.0000 | 0.0028 | 0.0002 | 0.0002 | 0.0076 | 0.0008 | 0.0000 | 0.0555 | 0.0003 | 0.6182 |
| <b>D(S5)</b> | 0.0032 | 0.0013 | 0.1445 | 0.3150 | 0.0000 | 0.0000 | 0.0034 | 0.0002 | 0.0001 | 0.0077 | 0.0008 | 0.0000 | 0.0301 | 0.0012 | 0.5075 |
| <b>D(S6)</b> | 0.0010 | 0.0005 | 0.1256 | 0.1542 | 0.0000 | 0.0000 | 0.0011 | 0.0002 | 0.0000 | 0.0077 | 0.0003 | 0.0000 | 0.1229 | 0.0036 | 0.4171 |
| <b>D(S7)</b> | 0.0021 | 0.0009 | 0.1708 | 0.3117 | 0.0000 | 0.0000 | 0.0026 | 0.0001 | 0.0001 | 0.0049 | 0.0008 | 0.0001 | 0.0729 | 0.0010 | 0.5679 |
| <b>E(S1)</b> | 0.0771 | 0.0267 | 0.0645 | 0.8951 | 0.0000 | 0.0345 | 0.0318 | 0.7311 | 0.0002 | 0.0293 | 0.0176 | 0.0001 | 0.0949 | 0.0001 | 2.0030 |
| <b>E(S2)</b> | 0.0805 | 0.0257 | 0.0265 | 0.3750 | 0.0000 | 0.0284 | 0.0264 | 0.3564 | 0.0002 | 0.0094 | 0.0178 | 0.0012 | 0.0720 | 0.0002 | 1.0198 |
| <b>E(S3)</b> | 0.0710 | 0.0210 | 0.0383 | 0.3647 | 0.0004 | 0.0149 | 0.0198 | 0.3891 | 0.0003 | 0.0162 | 0.0193 | 0.0006 | 0.1444 | 0.0004 | 1.1005 |
| <b>E(S4)</b> | 0.0656 | 0.0238 | 0.1360 | 0.4682 | 0.0503 | 0.0041 | 0.0662 | 0.3038 | 0.0007 | 0.0607 | 0.0314 | 0.0002 | 0.0027 | 0.0000 | 1.2136 |
| <b>E(S5)</b> | 0.0776 | 0.0281 | 0.0953 | 0.1072 | 0.0000 | 0.0025 | 0.1659 | 0.0249 | 0.0034 | 0.0039 | 0.0117 | 0.0001 | 0.0237 | 0.0000 | 0.5443 |
| <b>E(S6)</b> | 0.0734 | 0.0279 | 0.0962 | 0.3054 | 0.0003 | 0.0036 | 0.1009 | 0.0644 | 0.0006 | 0.0078 | 0.0177 | 0.0008 | 0.0187 | 0.0001 | 0.7178 |
| <b>E(S7)</b> | 0.0787 | 0.0266 | 0.0030 | 0.2502 | 0.0000 | 0.0274 | 0.0618 | 0.1779 | 0.0006 | 0.0583 | 0.0303 | 0.0020 | 0.0598 | 0.0000 | 0.7766 |
| <b>F(S1)</b> | 0.1113 | 0.0416 | 0.2287 | 0.8942 | 0.0001 | 0.0120 | 0.0243 | 0.2340 | 0.0003 | 0.0311 | 0.0634 | 0.0013 | 0.1398 | 0.0002 | 1.7823 |
| <b>F(S2)</b> | 0.1007 | 0.0321 | 0.1293 | 0.5440 | 0.0000 | 0.0017 | 0.0187 | 0.0642 | 0.0002 | 0.0087 | 0.0581 | 0.0010 | 0.1729 | 0.0001 | 1.1318 |
| <b>F(S3)</b> | 0.0919 | 0.0285 | 0.1383 | 0.5903 | 0.0001 | 0.0058 | 0.0246 | 0.1812 | 0.0002 | 0.0170 | 0.0668 | 0.0009 | 0.1829 | 0.0002 | 1.3287 |
| <b>F(S4)</b> | 0.0782 | 0.0265 | 0.0453 | 0.6197 | 0.0007 | 0.0118 | 0.0386 | 0.3887 | 0.0002 | 0.0173 | 0.0565 | 0.0023 | 0.0829 | 0.0002 | 1.3688 |
| <b>F(S5)</b> | 0.0757 | 0.0239 | 0.0072 | 0.4306 | 0.0000 | 0.0012 | 0.0339 | 0.1226 | 0.0003 | 0.0082 | 0.0560 | 0.0003 | 0.2109 | 0.0001 | 0.9708 |
| <b>F(S6)</b> | 0.1094 | 0.0355 | 0.1730 | 0.6725 | 0.0003 | 0.0090 | 0.0043 | 0.2453 | 0.0003 | 0.0182 | 0.1212 | 0.0060 | 0.1722 | 0.0001 | 1.5671 |
| <b>F(S7)</b> | 0.0893 | 0.0264 | 0.0657 | 0.6017 | 0.0000 | 0.0031 | 0.0115 | 0.0368 | 0.0002 | 0.0099 | 0.0693 | 0.0033 | 0.1157 | 0.0000 | 1.0330 |
| <b>G(S1)</b> | 0.0068 | 0.0023 | 0.1539 | 0.4508 | 0.0031 | 0.0000 | 0.0012 | 0.0036 | 0.0001 | 0.0010 | 0.0040 | 0.0001 | 0.0422 | 0.0000 | 0.6689 |
| <b>G(S2)</b> | 0.0083 | 0.0025 | 0.0484 | 0.1717 | 0.0765 | 0.0000 | 0.0005 | 0.0014 | 0.0000 | 0.0005 | 0.0032 | 0.0000 | 0.0396 | 0.0000 | 0.3527 |
| <b>G(S3)</b> | 0.0160 | 0.0037 | 0.2361 | 0.4509 | 0.0023 | 0.0003 | 0.0033 | 0.0050 | 0.0003 | 0.0020 | 0.0060 | 0.0016 | 0.0980 | 0.0001 | 0.8256 |
| <b>G(S4)</b> | 0.0187 | 0.0044 | 0.1950 | 0.4509 | 0.0824 | 0.0000 | 0.0004 | 0.0032 | 0.0001 | 0.0017 | 0.0129 | 0.0001 | 0.0517 | 0.0000 | 0.8216 |
| <b>G(S5)</b> | 0.0216 | 0.0063 | 0.1585 | 0.4564 | 0.0000 | 0.0072 | 0.0081 | 0.2584 | 0.0001 | 0.0042 | 0.0083 | 0.0013 | 0.0125 | 0.0000 | 0.9428 |
| <b>G(S6)</b> | 0.0041 | 0.0017 | 0.0096 | 0.0710 | 0.0030 | 0.0001 | 0.0001 | 0.0188 | 0.0000 | 0.0019 | 0.0029 | 0.0000 | 0.0027 | 0.0002 | 0.1161 |
| <b>G(S7)</b> | 0.0035 | 0.0012 | 0.0323 | 0.1082 | 0.0620 | 0.0000 | 0.0000 | 0.0043 | 0.0001 | 0.0008 | 0.0016 | 0.0000 | 0.0292 | 0.0001 | 0.2433 |

|              |        |        |        |        |        |        |        |        |        |        |        |        |        |        |        |
|--------------|--------|--------|--------|--------|--------|--------|--------|--------|--------|--------|--------|--------|--------|--------|--------|
| <b>H(S1)</b> | 0.0010 | 0.0004 | 0.0187 | 0.0398 | 0.0000 | 0.0000 | 0.0000 | 0.0036 | 0.0001 | 0.0011 | 0.0007 | 0.0001 | 0.0033 | 0.0000 | 0.0683 |
| <b>H(S2)</b> | 0.0000 | 0.0000 | 0.0016 | 0.0001 | 0.0000 | 0.0000 | 0.0004 | 0.0005 | 0.0000 | 0.0098 | 0.0001 | 0.0000 | 0.0000 | 0.0000 | 0.0126 |
| <b>H(S3)</b> | 0.0000 | 0.0000 | 0.0019 | 0.0000 | 0.0000 | 0.0000 | 0.0006 | 0.0000 | 0.0001 | 0.0042 | 0.0000 | 0.0000 | 0.0424 | 0.0000 | 0.0491 |
| <b>H(S4)</b> | 0.0016 | 0.0009 | 0.0135 | 0.0569 | 0.0055 | 0.0000 | 0.0010 | 0.0077 | 0.0001 | 0.0023 | 0.0013 | 0.0010 | 0.0029 | 0.0000 | 0.0947 |
| <b>H(S5)</b> | 0.0000 | 0.0000 | 0.0003 | 0.0001 | 0.0000 | 0.0000 | 0.0003 | 0.0014 | 0.0000 | 0.0093 | 0.0001 | 0.0000 | 0.0219 | 0.0000 | 0.0334 |
| <b>H(S6)</b> | 0.0033 | 0.0011 | 0.0043 | 0.0682 | 0.0000 | 0.0007 | 0.0058 | 0.0507 | 0.0000 | 0.0005 | 0.0013 | 0.0000 | 0.0175 | 0.0000 | 0.1533 |
| <b>H(S7)</b> | 0.0000 | 0.0000 | 0.0047 | 0.0214 | 0.0000 | 0.0000 | 0.0045 | 0.0089 | 0.0000 | 0.0014 | 0.0001 | 0.0000 | 0.0065 | 0.0000 | 0.0282 |
| <b>I(S1)</b> | 0.0000 | 0.0000 | 0.0007 | 0.0000 | 0.0000 | 0.0000 | 0.0003 | 0.0000 | 0.0001 | 0.0142 | 0.0000 | 0.0000 | 0.0000 | 0.0000 | 0.0152 |
| <b>I(S2)</b> | 0.0002 | 0.0000 | 0.0003 | 0.0000 | 0.0000 | 0.0000 | 0.0027 | 0.0000 | 0.0000 | 0.0043 | 0.0000 | 0.0000 | 0.0000 | 0.0000 | 0.0077 |
| <b>I(S3)</b> | 0.0001 | 0.0000 | 0.0001 | 0.0001 | 0.0000 | 0.0000 | 0.0000 | 0.0000 | 0.0001 | 0.0001 | 0.0000 | 0.0000 | 0.0000 | 0.0000 | 0.0005 |
| <b>I(S4)</b> | 0.0000 | 0.0000 | 0.0019 | 0.0000 | 0.0000 | 0.0000 | 0.0026 | 0.0000 | 0.0000 | 0.0080 | 0.0000 | 0.0000 | 0.0000 | 0.0000 | 0.0125 |
| <b>I(S5)</b> | 0.0000 | 0.0000 | 0.0006 | 0.0000 | 0.0000 | 0.0000 | 0.0000 | 0.0000 | 0.0001 | 0.0074 | 0.0000 | 0.0000 | 0.0000 | 0.0000 | 0.0082 |
| <b>I(S6)</b> | 0.0000 | 0.0000 | 0.0019 | 0.0003 | 0.0000 | 0.0000 | 0.0093 | 0.0000 | 0.0002 | 0.0756 | 0.0000 | 0.0000 | 0.0000 | 0.0000 | 0.0873 |
| <b>I(S7)</b> | 0.0000 | 0.0000 | 0.0004 | 0.0000 | 0.0000 | 0.0000 | 0.0006 | 0.0000 | 0.0001 | 0.0088 | 0.0000 | 0.0000 | 0.0000 | 0.0003 | 0.0102 |

**Continued of Table S1**

| <b>Samples</b> | <b>Analytes (mg/g)</b> |           |           |           |           |           |           |           |           |           |           |           |           |           |
|----------------|------------------------|-----------|-----------|-----------|-----------|-----------|-----------|-----------|-----------|-----------|-----------|-----------|-----------|-----------|
|                | <b>15</b>              | <b>16</b> | <b>17</b> | <b>18</b> | <b>19</b> | <b>20</b> | <b>21</b> | <b>22</b> | <b>23</b> | <b>24</b> | <b>25</b> | <b>26</b> | <b>27</b> | <b>28</b> |
| <b>A(S1)</b>   | 0.0478                 | 0.0795    | 0.0163    | 0.0714    | 0.7770    | 0.0493    | 0.1345    | 0.0998    | 0.0611    | 0.0000    | 0.0001    | 0.0000    | 0.0801    | 0.5797    |
| <b>A(S2)</b>   | 0.0331                 | 0.1480    | 0.0713    | 0.1440    | 0.8657    | 0.1027    | 0.2065    | 0.0859    | 0.0897    | 0.0000    | 0.0001    | 0.0000    | 0.1054    | 0.2689    |
| <b>A(S3)</b>   | 0.0080                 | 0.0316    | 0.0132    | 0.0380    | 0.6733    | 0.0291    | 0.0875    | 0.0452    | 0.0308    | 0.1100    | 0.0001    | 0.0001    | 0.1891    | 0.5030    |
| <b>A(S4)</b>   | 0.0194                 | 0.0657    | 0.0175    | 0.0662    | 0.6385    | 0.0644    | 0.1172    | 0.1174    | 0.0505    | 0.1297    | 0.0001    | 0.0001    | 0.0476    | 0.4965    |
| <b>A(S5)</b>   | 0.0877                 | 0.2443    | 0.1030    | 0.2966    | 0.7778    | 0.0627    | 0.3124    | 0.0738    | 0.1421    | 0.1184    | 0.0001    | 0.0003    | 0.1303    | 0.8256    |
| <b>A(S6)</b>   | 0.0912                 | 0.2536    | 0.1231    | 0.2502    | 0.8022    | 0.1424    | 0.3144    | 0.1784    | 0.1970    | 0.0000    | 0.0001    | 0.0017    | 0.2502    | 0.5247    |
| <b>A(S7)</b>   | 0.0739                 | 0.3769    | 0.1618    | 0.3637    | 0.7320    | 0.1735    | 0.4081    | 0.1898    | 0.1546    | 0.1465    | 0.0001    | 0.0003    | 0.1878    | 0.9075    |
| <b>B(S1)</b>   | 0.0390                 | 0.1069    | 0.0225    | 0.0897    | 0.9047    | 0.0627    | 0.1673    | 0.1076    | 0.0644    | 0.1087    | 0.0001    | 0.0002    | 0.0890    | 0.5736    |
| <b>B(S2)</b>   | 0.0627                 | 0.3389    | 0.1178    | 0.3216    | 1.0093    | 0.1401    | 0.4140    | 0.1064    | 0.1807    | 0.1209    | 0.0001    | 0.0001    | 0.1256    | 0.3373    |

|              |        |        |        |        |        |        |        |        |        |        |        |        |        |        |
|--------------|--------|--------|--------|--------|--------|--------|--------|--------|--------|--------|--------|--------|--------|--------|
| <b>B(S3)</b> | 0.0189 | 0.0522 | 0.0140 | 0.0575 | 0.9014 | 0.0247 | 0.1250 | 0.0910 | 0.0528 | 0.1419 | 0.0001 | 0.0000 | 0.0671 | 0.4507 |
| <b>B(S4)</b> | 0.0475 | 0.3033 | 0.0882 | 0.2449 | 0.8303 | 0.1278 | 0.2828 | 0.1044 | 0.1021 | 0.0000 | 0.0001 | 0.0003 | 0.1173 | 0.6240 |
| <b>B(S5)</b> | 0.0945 | 0.2710 | 0.1303 | 0.2946 | 1.0451 | 0.0680 | 0.3241 | 0.1315 | 0.1945 | 0.0000 | 0.0001 | 0.0001 | 0.1387 | 1.0761 |
| <b>B(S6)</b> | 0.0294 | 0.1854 | 0.1453 | 0.1815 | 0.8067 | 0.0962 | 0.1506 | 0.2300 | 0.1186 | 0.1122 | 0.0001 | 0.0003 | 0.0648 | 0.4946 |
| <b>B(S7)</b> | 0.0857 | 0.5506 | 0.1979 | 0.4972 | 0.9277 | 0.1943 | 0.5736 | 0.1803 | 0.2182 | 0.1495 | 0.0001 | 0.0005 | 0.1716 | 1.3427 |
| <b>C(S1)</b> | 0.0487 | 0.1120 | 0.0154 | 0.1170 | 1.1132 | 0.0677 | 0.2452 | 0.2082 | 0.1523 | 0.1203 | 0.0001 | 0.0002 | 0.1406 | 0.4576 |
| <b>C(S2)</b> | 0.0720 | 0.2641 | 0.0689 | 0.3321 | 1.1141 | 0.1314 | 0.4787 | 0.1836 | 0.2475 | 0.1289 | 0.0001 | 0.0002 | 0.3296 | 0.2365 |
| <b>C(S3)</b> | 0.0301 | 0.0640 | 0.0100 | 0.0782 | 0.8482 | 0.0397 | 0.1571 | 0.1362 | 0.1128 | 0.1890 | 0.0001 | 0.0001 | 0.3780 | 0.3659 |
| <b>C(S4)</b> | 0.0451 | 0.1592 | 0.0261 | 0.1656 | 0.9999 | 0.1199 | 0.2435 | 0.1427 | 0.1411 | 0.1153 | 0.0001 | 0.0002 | 0.1453 | 0.4279 |
| <b>C(S5)</b> | 0.0667 | 0.2049 | 0.0532 | 0.2712 | 1.1084 | 0.0759 | 0.3606 | 0.2382 | 0.2070 | 0.1508 | 0.0001 | 0.0001 | 0.2968 | 0.8749 |
| <b>C(S6)</b> | 0.0411 | 0.1565 | 0.0613 | 0.1897 | 1.0475 | 0.1149 | 0.2234 | 0.3239 | 0.1584 | 0.1106 | 0.0001 | 0.0001 | 0.1001 | 0.4295 |
| <b>C(S7)</b> | 0.0628 | 0.2760 | 0.0689 | 0.3353 | 0.9288 | 0.1312 | 0.4575 | 0.2622 | 0.2013 | 0.2034 | 0.0001 | 0.0002 | 0.2780 | 0.8407 |
| <b>D(S1)</b> | 0.0431 | 0.0903 | 0.0198 | 0.0886 | 1.1435 | 0.0510 | 0.2161 | 0.1645 | 0.0616 | 0.1147 | 0.0001 | 0.0000 | 0.3034 | 0.3069 |
| <b>D(S2)</b> | 0.0518 | 0.2020 | 0.0930 | 0.1895 | 1.1578 | 0.1363 | 0.3450 | 0.1720 | 0.1246 | 0.0908 | 0.0001 | 0.0000 | 0.3535 | 0.2381 |
| <b>D(S3)</b> | 0.0143 | 0.0424 | 0.0162 | 0.0498 | 0.9967 | 0.0331 | 0.1197 | 0.0948 | 0.0434 | 0.1095 | 0.0001 | 0.0000 | 0.2421 | 0.3610 |
| <b>D(S4)</b> | 0.0317 | 0.0925 | 0.0203 | 0.0932 | 0.9091 | 0.0466 | 0.1824 | 0.1786 | 0.0665 | 0.0000 | 0.0001 | 0.0002 | 0.0729 | 0.3692 |
| <b>D(S5)</b> | 0.0720 | 0.1774 | 0.0785 | 0.2356 | 0.9748 | 0.0546 | 0.3269 | 0.1629 | 0.1555 | 0.1502 | 0.0003 | 0.0001 | 0.2338 | 0.7078 |
| <b>D(S6)</b> | 0.0576 | 0.2003 | 0.1334 | 0.2056 | 0.9369 | 0.1482 | 0.2889 | 0.1162 | 0.0998 | 0.0000 | 0.0001 | 0.0001 | 0.2026 | 0.2737 |
| <b>D(S7)</b> | 0.0756 | 0.3737 | 0.1581 | 0.3581 | 1.0616 | 0.1527 | 0.5035 | 0.2668 | 0.1594 | 0.0000 | 0.0001 | 0.0001 | 0.2316 | 0.6706 |
| <b>E(S1)</b> | 0.0417 | 0.1024 | 0.0478 | 0.1538 | 0.9443 | 0.0498 | 0.3754 | 2.1155 | 0.0006 | 0.2081 | 0.0003 | 0.0006 | 0.4113 | 1.7830 |
| <b>E(S2)</b> | 0.0360 | 0.1017 | 0.0516 | 0.1562 | 0.3988 | 0.0354 | 0.2845 | 1.5609 | 0.0012 | 0.1565 | 0.0003 | 0.0004 | 0.3133 | 0.8404 |
| <b>E(S3)</b> | 0.0188 | 0.0543 | 0.0369 | 0.0858 | 0.3434 | 0.0256 | 0.2095 | 1.2848 | 0.0157 | 0.1513 | 0.0004 | 0.0001 | 0.6169 | 0.9416 |
| <b>E(S4)</b> | 0.0559 | 0.1281 | 0.0598 | 0.1576 | 0.5045 | 0.0527 | 0.3374 | 1.8751 | 0.0002 | 0.2011 | 0.0004 | 0.0012 | 0.7295 | 1.2335 |
| <b>E(S5)</b> | 0.0515 | 0.1246 | 0.0708 | 0.1712 | 0.3014 | 0.0511 | 0.3770 | 0.4415 | 0.0028 | 0.2301 | 0.0007 | 0.0005 | 1.2793 | 0.5717 |
| <b>E(S6)</b> | 0.0366 | 0.0996 | 0.0478 | 0.1414 | 0.2242 | 0.0373 | 0.3002 | 0.8475 | 0.0007 | 0.2044 | 0.0005 | 0.0010 | 0.8333 | 1.0754 |
| <b>E(S7)</b> | 0.0493 | 0.1188 | 0.0457 | 0.1622 | 0.3056 | 0.0516 | 0.3296 | 0.8374 | 0.0138 | 0.1295 | 0.0002 | 0.0005 | 0.6140 | 0.9309 |

|              |        |        |        |        |        |        |        |        |        |        |        |        |        |        |
|--------------|--------|--------|--------|--------|--------|--------|--------|--------|--------|--------|--------|--------|--------|--------|
| <b>F(S1)</b> | 0.0995 | 0.2374 | 0.0513 | 0.3285 | 0.5644 | 0.1035 | 0.7567 | 0.3989 | 0.0014 | 0.3286 | 0.0001 | 0.0002 | 0.7870 | 1.4806 |
| <b>F(S2)</b> | 0.1359 | 0.3066 | 0.0663 | 0.4191 | 0.2538 | 0.1303 | 0.7118 | 0.3298 | 0.0012 | 0.2666 | 0.0002 | 0.0014 | 0.7082 | 0.8131 |
| <b>F(S3)</b> | 0.0566 | 0.1458 | 0.0331 | 0.2272 | 0.2691 | 0.0612 | 0.5086 | 0.2221 | 0.0002 | 0.2689 | 0.0002 | 0.0001 | 0.7578 | 0.5417 |
| <b>F(S4)</b> | 0.1462 | 0.3317 | 0.0723 | 0.3823 | 0.3546 | 0.1389 | 0.7515 | 0.3465 | 0.0845 | 0.2792 | 0.0001 | 0.0002 | 0.9601 | 0.5643 |
| <b>F(S5)</b> | 0.1829 | 0.4081 | 0.0842 | 0.5483 | 0.1550 | 0.1655 | 0.9761 | 0.4502 | 0.0005 | 0.3587 | 0.0002 | 0.0003 | 1.0568 | 0.7468 |
| <b>F(S6)</b> | 0.1244 | 0.2938 | 0.0899 | 0.4257 | 0.2163 | 0.1029 | 0.8264 | 0.2658 | 0.0225 | 0.1738 | 0.0002 | 0.0011 | 0.7266 | 1.5967 |
| <b>F(S7)</b> | 0.1704 | 0.3762 | 0.0792 | 0.4631 | 0.4108 | 0.1719 | 0.8847 | 0.4760 | 0.0272 | 0.3402 | 0.0002 | 0.0041 | 0.7100 | 0.9406 |
| <b>G(S1)</b> | 0.1172 | 0.2301 | 0.0422 | 0.2456 | 0.6271 | 0.1356 | 0.3927 | 0.3214 | 0.5553 | 0.1794 | 0.0001 | 0.1626 | 0.0243 | 1.1878 |
| <b>G(S2)</b> | 0.0870 | 0.1707 | 0.0326 | 0.2140 | 0.3479 | 0.0807 | 0.2591 | 0.2895 | 0.2987 | 0.0875 | 0.0001 | 0.0927 | 0.0213 | 0.2993 |
| <b>G(S3)</b> | 0.0266 | 0.0618 | 0.0118 | 0.1004 | 0.1516 | 0.0731 | 0.2379 | 0.1711 | 0.2267 | 0.1038 | 0.0002 | 0.1347 | 0.0700 | 0.4742 |
| <b>G(S4)</b> | 0.1004 | 0.2040 | 0.0472 | 0.2703 | 0.5371 | 0.1259 | 0.4449 | 0.3316 | 0.5311 | 0.1603 | 0.0001 | 0.1992 | 0.0174 | 0.9875 |
| <b>G(S5)</b> | 0.0807 | 0.1361 | 0.0392 | 0.2136 | 0.3825 | 0.1088 | 0.3961 | 0.2757 | 0.5161 | 0.2261 | 0.0002 | 0.1965 | 0.0609 | 1.2783 |
| <b>G(S6)</b> | 0.0671 | 0.1280 | 0.0319 | 0.1428 | 0.3152 | 0.0544 | 0.1944 | 0.1280 | 0.2051 | 0.0102 | 0.0001 | 0.0812 | 0.0575 | 0.3269 |
| <b>G(S7)</b> | 0.0325 | 0.0726 | 0.0125 | 0.0857 | 0.1341 | 0.0395 | 0.1312 | 0.1009 | 0.1222 | 0.0000 | 0.0000 | 0.0620 | 0.0220 | 0.1927 |
| <b>H(S1)</b> | 0.1077 | 0.2033 | 0.0444 | 0.2087 | 0.1645 | 0.0634 | 0.2728 | 0.1986 | 0.4377 | 0.1176 | 0.0000 | 0.0499 | 0.1908 | 0.1289 |
| <b>H(S2)</b> | 0.1834 | 0.3232 | 0.0650 | 0.3586 | 0.2796 | 0.0938 | 0.4053 | 0.4641 | 0.5517 | 0.1991 | 0.0001 | 0.0796 | 0.3929 | 0.2904 |
| <b>H(S3)</b> | 0.1131 | 0.2077 | 0.0440 | 0.2444 | 0.1984 | 0.0671 | 0.3284 | 0.2713 | 0.6128 | 0.0000 | 0.0000 | 0.0664 | 0.3364 | 0.0594 |
| <b>H(S4)</b> | 0.1731 | 0.3140 | 0.0600 | 0.3161 | 0.3494 | 0.0744 | 0.3915 | 0.3785 | 0.3026 | 0.2711 | 0.0001 | 0.1857 | 0.2730 | 0.4588 |
| <b>H(S5)</b> | 0.1855 | 0.3107 | 0.0741 | 0.3502 | 0.2619 | 0.0975 | 0.4303 | 0.3729 | 0.4941 | 0.2170 | 0.0001 | 0.0154 | 0.5000 | 0.3798 |
| <b>H(S6)</b> | 0.1004 | 0.1782 | 0.0396 | 0.1743 | 0.1401 | 0.0447 | 0.1843 | 0.1690 | 0.0682 | 0.0950 | 0.0000 | 0.0004 | 0.1859 | 0.1442 |
| <b>H(S7)</b> | 0.1467 | 0.2685 | 0.0532 | 0.2647 | 0.2934 | 0.0731 | 0.3161 | 0.2336 | 0.3648 | 0.1254 | 0.0000 | 0.1738 | 0.2871 | 0.1667 |
| <b>I(S1)</b> | 0.0656 | 0.1102 | 0.0313 | 0.1105 | 0.0870 | 0.0443 | 0.1478 | 0.1085 | 0.1008 | 0.0000 | 0.0000 | 0.0678 | 0.4317 | 0.0675 |
| <b>I(S2)</b> | 0.0289 | 0.0380 | 0.0196 | 0.0409 | 0.0194 | 0.0211 | 0.0599 | 0.0440 | 0.0471 | 0.0138 | 0.0001 | 0.0268 | 0.2271 | 0.0101 |
| <b>I(S3)</b> | 0.0183 | 0.0106 | 0.0078 | 0.0126 | 0.0238 | 0.0093 | 0.0213 | 0.0089 | 0.0257 | 0.0000 | 0.0000 | 0.0130 | 0.1102 | 0.0035 |
| <b>I(S4)</b> | 0.0507 | 0.0736 | 0.0273 | 0.0742 | 0.0498 | 0.0326 | 0.0965 | 0.0693 | 0.0781 | 0.0000 | 0.0000 | 0.0467 | 0.3293 | 0.0396 |
| <b>I(S5)</b> | 0.0430 | 0.0647 | 0.0226 | 0.0654 | 0.0230 | 0.0313 | 0.0916 | 0.0704 | 0.0715 | 0.0603 | 0.0000 | 0.0447 | 0.2821 | 0.0378 |

|              |        |        |        |        |        |        |        |        |        |        |        |        |        |        |
|--------------|--------|--------|--------|--------|--------|--------|--------|--------|--------|--------|--------|--------|--------|--------|
| <b>I(S6)</b> | 0.0989 | 0.1745 | 0.0628 | 0.1850 | 0.2310 | 0.0909 | 0.3189 | 0.2752 | 0.1899 | 0.0781 | 0.0001 | 0.0977 | 1.4216 | 0.2227 |
| <b>I(S7)</b> | 0.0488 | 0.0713 | 0.0230 | 0.0697 | 0.0329 | 0.0336 | 0.1026 | 0.0872 | 0.0792 | 0.0287 | 0.0001 | 0.0327 | 0.3327 | 0.0017 |

Continued of Table S1

| Samples      | Analytes (mg/g) |        |         |        |        |        |        |         | Analytes (%) |         |           |           |                |
|--------------|-----------------|--------|---------|--------|--------|--------|--------|---------|--------------|---------|-----------|-----------|----------------|
|              | 29              | 30     | 31      | 32     | 33     | 34     | 35     | TA      | fructose     | glucose | Raffinose | Stachyose | polysaccharide |
| <b>A(S1)</b> | 0.0049          | 0.0558 | 10.6274 | 2.2795 | 0.4363 | 0.1633 | 0.0021 | 15.5658 | 2.60         | 2.75    | 0.49      | 4.43      | 10.32          |
| <b>A(S2)</b> | 0.0069          | 0.0389 | 6.4090  | 1.3540 | 0.2862 | 0.0891 | 0.0010 | 10.3065 | 2.47         | 2.42    | 0.48      | 2.59      | 11.68          |
| <b>A(S3)</b> | 0.0063          | 0.0466 | 9.3230  | 2.0571 | 0.3467 | 0.1688 | 0.0011 | 13.7086 | 1.72         | 1.68    | 0.55      | 3.41      | 8.29           |
| <b>A(S4)</b> | 0.0048          | 0.0515 | 11.9702 | 2.7302 | 0.4332 | 0.1691 | 0.0013 | 17.1910 | 2.45         | 2.17    | 0.39      | 5.11      | 6.86           |
| <b>A(S5)</b> | 0.0109          | 0.1121 | 10.9478 | 2.1693 | 0.5941 | 0.3348 | 0.0015 | 17.3455 | 2.43         | 2.62    | 0.57      | 4.26      | 18.32          |
| <b>A(S6)</b> | 0.0458          | 0.1132 | 6.7538  | 1.7936 | 0.9075 | 0.1011 | 0.0009 | 12.8452 | 2.56         | 2.53    | 0.53      | 2.29      | 4.70           |
| <b>A(S7)</b> | 0.0182          | 0.0714 | 8.7233  | 2.0442 | 0.5235 | 0.2345 | 0.0007 | 15.4922 | 3.21         | 3.43    | 0.30      | 2.96      | 19.94          |
| <b>B(S1)</b> | 0.0124          | 0.0519 | 11.9511 | 2.2221 | 0.4477 | 0.1735 | 0.0022 | 17.1972 | 3.19         | 3.31    | 0.45      | 4.18      | 10.07          |
| <b>B(S2)</b> | 0.0394          | 0.0514 | 7.7168  | 1.2826 | 0.4236 | 0.1865 | 0.0013 | 12.9773 | 3.61         | 3.80    | 0.24      | 2.63      | 11.66          |
| <b>B(S3)</b> | 0.0051          | 0.0624 | 9.7075  | 2.1238 | 0.4142 | 0.3259 | 0.0015 | 14.6377 | 2.57         | 2.54    | 0.33      | 3.42      | 10.30          |
| <b>B(S4)</b> | 0.0206          | 0.0555 | 11.6337 | 2.5756 | 0.5427 | 0.2263 | 0.0008 | 17.9282 | 2.77         | 2.91    | 0.28      | 4.46      | 8.93           |
| <b>B(S5)</b> | 0.0070          | 0.1205 | 11.6809 | 3.0028 | 0.7123 | 0.4212 | 0.0025 | 19.7156 | 2.99         | 3.15    | 0.32      | 4.23      | 10.62          |
| <b>B(S6)</b> | 0.0270          | 0.0431 | 8.4565  | 1.5220 | 0.5199 | 0.1596 | 0.0005 | 13.3441 | 3.38         | 3.42    | 0.41      | 3.11      | 8.57           |
| <b>B(S7)</b> | 0.0213          | 0.0981 | 9.1033  | 2.1422 | 0.5541 | 0.2639 | 0.0009 | 17.2736 | 3.91         | 4.38    | 0.13      | 3.17      | 7.09           |
| <b>C(S1)</b> | 0.0098          | 0.0944 | 13.4546 | 1.9512 | 0.5863 | 0.1670 | 0.0018 | 19.0635 | 4.26         | 4.34    | 0.30      | 4.60      | 11.28          |
| <b>C(S2)</b> | 0.0097          | 0.1238 | 8.4996  | 1.3640 | 0.5250 | 0.1762 | 0.0013 | 14.2873 | 4.41         | 4.73    | 0.18      | 3.47      | 9.90           |
| <b>C(S3)</b> | 0.0053          | 0.0837 | 10.6343 | 1.7728 | 0.4570 | 0.1298 | 0.0008 | 15.4932 | 4.03         | 4.19    | 0.25      | 3.95      | 10.46          |
| <b>C(S4)</b> | 0.0108          | 0.0964 | 14.9663 | 2.7903 | 0.4603 | 0.2334 | 0.0010 | 21.2904 | 3.54         | 3.78    | 0.25      | 6.03      | 12.59          |
| <b>C(S5)</b> | 0.0047          | 0.1631 | 13.5687 | 2.2846 | 0.6665 | 0.5755 | 0.0014 | 21.1731 | 3.72         | 4.00    | 0.18      | 5.29      | 12.58          |
| <b>C(S6)</b> | 0.0103          | 0.0867 | 10.0054 | 1.4301 | 0.5275 | 0.1588 | 0.0007 | 15.1768 | 4.60         | 4.63    | 0.26      | 3.75      | 11.69          |
| <b>C(S7)</b> | 0.0100          | 0.1477 | 9.0850  | 1.9497 | 0.6139 | 0.2005 | 0.0020 | 16.0552 | 4.38         | 4.52    | 0.17      | 2.17      | 10.90          |

|              |        |        |         |        |        |        |        |         |       |       |      |      |       |
|--------------|--------|--------|---------|--------|--------|--------|--------|---------|-------|-------|------|------|-------|
| <b>D(S1)</b> | 0.0020 | 0.0366 | 11.6316 | 2.3546 | 0.4737 | 0.2297 | 0.0020 | 17.3338 | 3.39  | 4.15  | 0.26 | 7.39 | 5.40  |
| <b>D(S2)</b> | 0.0007 | 0.0691 | 7.2842  | 1.4114 | 0.3882 | 0.1574 | 0.0032 | 12.4687 | 3.72  | 4.56  | 0.00 | 2.21 | 12.56 |
| <b>D(S3)</b> | 0.0017 | 0.0634 | 9.3873  | 2.0199 | 0.3659 | 0.1968 | 0.0020 | 14.1601 | 2.84  | 3.32  | 0.00 | 3.89 | 16.49 |
| <b>D(S4)</b> | 0.0084 | 0.0698 | 11.8503 | 3.0839 | 0.4736 | 0.2067 | 0.0020 | 17.7579 | 3.17  | 3.93  | 0.00 | 7.52 | 10.53 |
| <b>D(S5)</b> | 0.0034 | 0.1498 | 10.4661 | 2.1546 | 0.5422 | 0.2575 | 0.0035 | 16.9077 | 3.08  | 3.68  | 0.00 | 5.43 | 20.10 |
| <b>D(S6)</b> | 0.0052 | 0.0519 | 7.6387  | 1.4983 | 0.6689 | 0.1634 | 0.0008 | 12.6905 | 3.07  | 3.63  | 0.00 | 2.60 | 16.77 |
| <b>D(S7)</b> | 0.0045 | 0.0939 | 8.7173  | 1.9557 | 0.5503 | 0.2435 | 0.0013 | 15.5783 | 3.97  | 4.82  | 0.00 | 3.33 | 10.81 |
| <b>E(S1)</b> | 0.0227 | 0.1103 | 2.6686  | 0.5243 | 0.5180 | 0.0689 | 0.0055 | 10.1529 | 3.81  | 3.42  | 0.10 | 0.66 | 5.15  |
| <b>E(S2)</b> | 0.0249 | 0.0117 | 1.8092  | 0.2580 | 0.3753 | 0.0466 | 0.0016 | 6.4645  | 4.12  | 3.69  | 0.00 | 0.94 | 4.20  |
| <b>E(S3)</b> | 0.0083 | 0.0047 | 1.4771  | 0.2420 | 0.2603 | 0.0434 | 0.0047 | 5.8259  | 1.70  | 1.47  | 0.00 | 0.95 | 3.78  |
| <b>E(S4)</b> | 0.0420 | 0.0119 | 3.3677  | 0.6581 | 0.4856 | 0.0875 | 0.0049 | 9.9947  | 3.17  | 2.72  | 0.00 | 1.17 | 3.75  |
| <b>E(S5)</b> | 0.0247 | 0.0000 | 1.6808  | 0.6703 | 0.5191 | 0.1172 | 0.0060 | 6.6922  | 0.76  | 0.98  | 0.00 | 1.00 | 3.88  |
| <b>E(S6)</b> | 0.0150 | 0.0016 | 0.6569  | 0.3109 | 0.4171 | 0.0462 | 0.0049 | 5.3027  | 1.01  | 1.07  | 0.00 | 0.32 | 3.69  |
| <b>E(S7)</b> | 0.0173 | 0.0042 | 1.2099  | 0.4083 | 0.4829 | 0.0452 | 0.0067 | 5.7636  | 1.61  | 1.61  | 0.00 | 0.45 | 3.96  |
| <b>F(S1)</b> | 0.0062 | 0.1776 | 2.6671  | 0.7082 | 0.6701 | 0.0703 | 0.0067 | 9.4444  | 3.67  | 4.22  | 1.80 | 1.29 | 3.03  |
| <b>F(S2)</b> | 0.0283 | 0.0789 | 0.7067  | 0.4138 | 0.7466 | 0.0811 | 0.0042 | 6.2040  | 4.01  | 4.58  | 1.59 | 0.92 | 3.14  |
| <b>F(S3)</b> | 0.0029 | 0.1182 | 0.7614  | 0.2598 | 0.4861 | 0.0382 | 0.0028 | 4.7621  | 2.17  | 2.75  | 1.64 | 1.10 | 3.43  |
| <b>F(S4)</b> | 0.0024 | 0.1391 | 0.7577  | 0.5134 | 0.7926 | 0.0446 | 0.0033 | 6.6655  | 2.55  | 3.05  | 1.49 | 0.98 | 3.30  |
| <b>F(S5)</b> | 0.0057 | 0.0258 | 0.6810  | 0.6025 | 0.9223 | 0.0729 | 0.0040 | 7.4479  | 7.87  | 7.58  | 0.80 | 0.34 | 4.04  |
| <b>F(S6)</b> | 0.0110 | 0.2488 | 0.6867  | 0.4319 | 0.6490 | 0.0534 | 0.0034 | 6.9503  | 2.44  | 2.91  | 1.01 | 0.86 | 3.77  |
| <b>F(S7)</b> | 0.0709 | 0.2968 | 0.5596  | 0.5029 | 1.0036 | 0.0368 | 0.0032 | 7.5281  | 4.96  | 5.53  | 0.94 | 0.36 | 4.86  |
| <b>G(S1)</b> | 0.3536 | 0.2099 | 6.4685  | 1.5880 | 0.7280 | 0.0518 | 0.0028 | 13.6240 | 20.76 | 23.65 | 0.00 | 2.29 | 9.85  |
| <b>G(S2)</b> | 0.2086 | 0.0921 | 3.8111  | 0.6266 | 0.4394 | 0.0229 | 0.0053 | 7.4873  | 26.08 | 29.10 | 0.00 | 2.08 | 5.89  |
| <b>G(S3)</b> | 0.2326 | 0.1258 | 2.2687  | 0.6450 | 0.5694 | 0.0253 | 0.0010 | 5.7117  | 10.91 | 9.62  | 0.00 | 0.58 | 6.14  |
| <b>G(S4)</b> | 0.3885 | 0.2213 | 3.8389  | 0.9154 | 0.8507 | 0.0347 | 0.0051 | 10.2116 | 20.46 | 22.56 | 0.00 | 1.24 | 10.95 |
| <b>G(S5)</b> | 0.3360 | 0.2528 | 3.9013  | 1.2336 | 0.9294 | 0.0725 | 0.0019 | 10.6381 | 20.62 | 20.30 | 0.00 | 0.00 | 5.35  |

|              |        |        |        |        |        |        |        |        |       |       |      |      |       |
|--------------|--------|--------|--------|--------|--------|--------|--------|--------|-------|-------|------|------|-------|
| <b>G(S6)</b> | 0.1312 | 0.0841 | 1.0401 | 0.3922 | 0.3858 | 0.0123 | 0.0004 | 3.7889 | 25.77 | 27.19 | 0.00 | 0.00 | 5.82  |
| <b>G(S7)</b> | 0.1164 | 0.0561 | 0.3380 | 0.1413 | 0.3220 | 0.0000 | 0.0006 | 1.9825 | 22.66 | 19.95 | 0.00 | 0.00 | 7.18  |
| <b>H(S1)</b> | 0.1896 | 0.1216 | 0.1326 | 0.2730 | 0.4724 | 0.0060 | 0.0074 | 3.3911 | 21.39 | 22.63 | 0.00 | 0.00 | 25.88 |
| <b>H(S2)</b> | 0.2795 | 0.2040 | 0.6287 | 0.5764 | 0.6562 | 0.0888 | 0.0478 | 6.1682 | 18.98 | 22.40 | 0.00 | 0.00 | 24.06 |
| <b>H(S3)</b> | 0.1758 | 0.1257 | 0.2196 | 0.3744 | 0.5273 | 0.0501 | 0.0061 | 4.0284 | 29.74 | 33.40 | 0.00 | 0.00 | 19.06 |
| <b>H(S4)</b> | 0.3364 | 0.1833 | 0.4615 | 1.1230 | 0.6583 | 0.0301 | 0.0045 | 6.3451 | 7.91  | 8.53  | 0.00 | 0.00 | 30.44 |
| <b>H(S5)</b> | 0.1500 | 0.2236 | 0.4296 | 0.7811 | 0.7415 | 0.0412 | 0.0350 | 6.0917 | 19.56 | 21.92 | 0.00 | 0.00 | 31.96 |
| <b>H(S6)</b> | 0.0179 | 0.0977 | 0.4259 | 0.3448 | 0.4150 | 0.0297 | 0.0015 | 2.8567 | 26.49 | 28.82 | 0.00 | 0.00 | 21.29 |
| <b>H(S7)</b> | 0.2725 | 0.1535 | 0.6136 | 0.7215 | 0.4945 | 0.0400 | 0.0294 | 5.0920 | 20.33 | 22.69 | 0.00 | 0.00 | 38.37 |
| <b>I(S1)</b> | 0.0655 | 0.0823 | 0.0416 | 0.1987 | 0.3123 | 0.6579 | 0.0015 | 2.7329 | 0.33  | 0.36  | 0.00 | 0.34 | 0.65  |
| <b>I(S2)</b> | 0.0090 | 0.0285 | 0.0228 | 0.2078 | 0.1660 | 0.0754 | 0.0006 | 1.1065 | 0.30  | 0.30  | 0.00 | 0.42 | 0.55  |
| <b>I(S3)</b> | 0.0038 | 0.0068 | 0.0191 | 0.0670 | 0.0730 | 0.0100 | 0.0003 | 0.4449 | 0.22  | 0.24  | 0.00 | 0.16 | 0.50  |
| <b>I(S4)</b> | 0.0453 | 0.0554 | 0.0393 | 0.4106 | 0.2540 | 0.0493 | 0.0021 | 1.8238 | 0.38  | 0.37  | 0.26 | 0.30 | 0.69  |
| <b>I(S5)</b> | 0.0295 | 0.0471 | 0.0374 | 0.2257 | 0.2405 | 0.2314 | 0.0008 | 1.7209 | 0.33  | 0.38  | 0.22 | 0.32 | 0.69  |
| <b>I(S6)</b> | 0.1892 | 0.2112 | 0.2268 | 1.8598 | 0.5190 | 0.6026 | 0.0069 | 7.0628 | 0.44  | 0.33  | 0.51 | 0.97 | 1.21  |
| <b>I(S7)</b> | 0.0068 | 0.0268 | 0.0411 | 0.0006 | 0.2560 | 0.6908 | 0.0005 | 1.9667 | 0.41  | 0.36  | 0.00 | 0.30 | 0.67  |

**Note:** TN= Total nucleosides, TA= Total amino acids

A was main root, B was lateral root, C was lateral root bark, D was main root bark, E was stem, F was leaf, G was pericarp, H was fruit pulp, I was seed kernels.

Wanlou 7 (S1), Wanlou 4-11 (S2), Wanlou 17 (S3), Wanlou 9 (S4), Wanlou 16 (S5), Wanlou 8 (S6), and Wanlou 7-8 (S7).



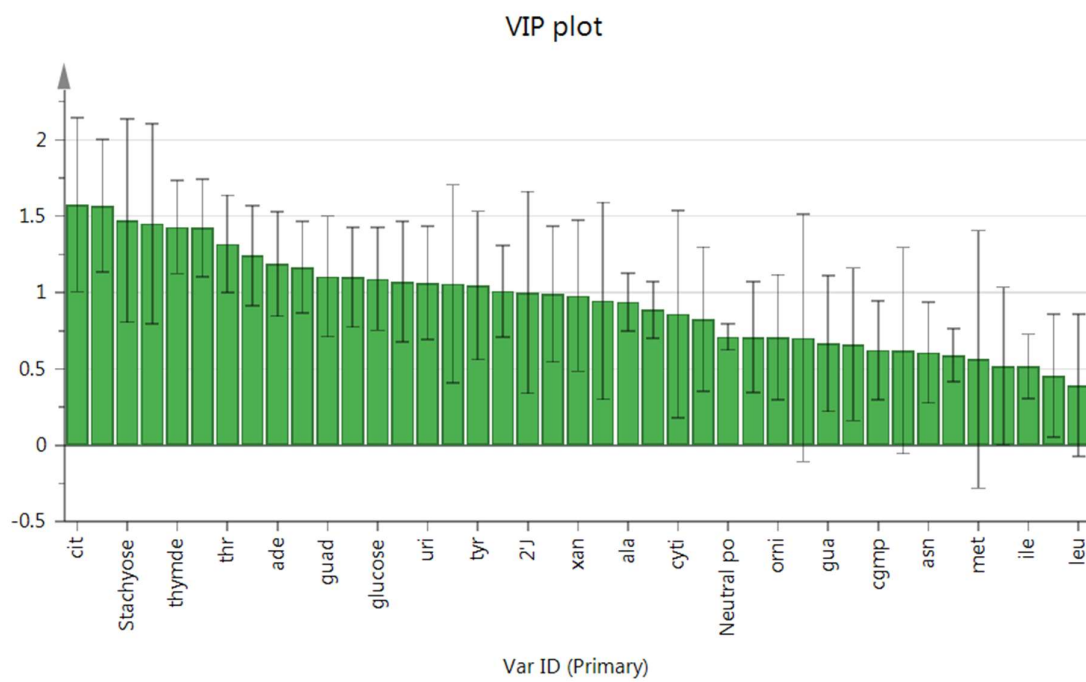

**Figure S1.** VIP plot of *T. kirilowii* samples.

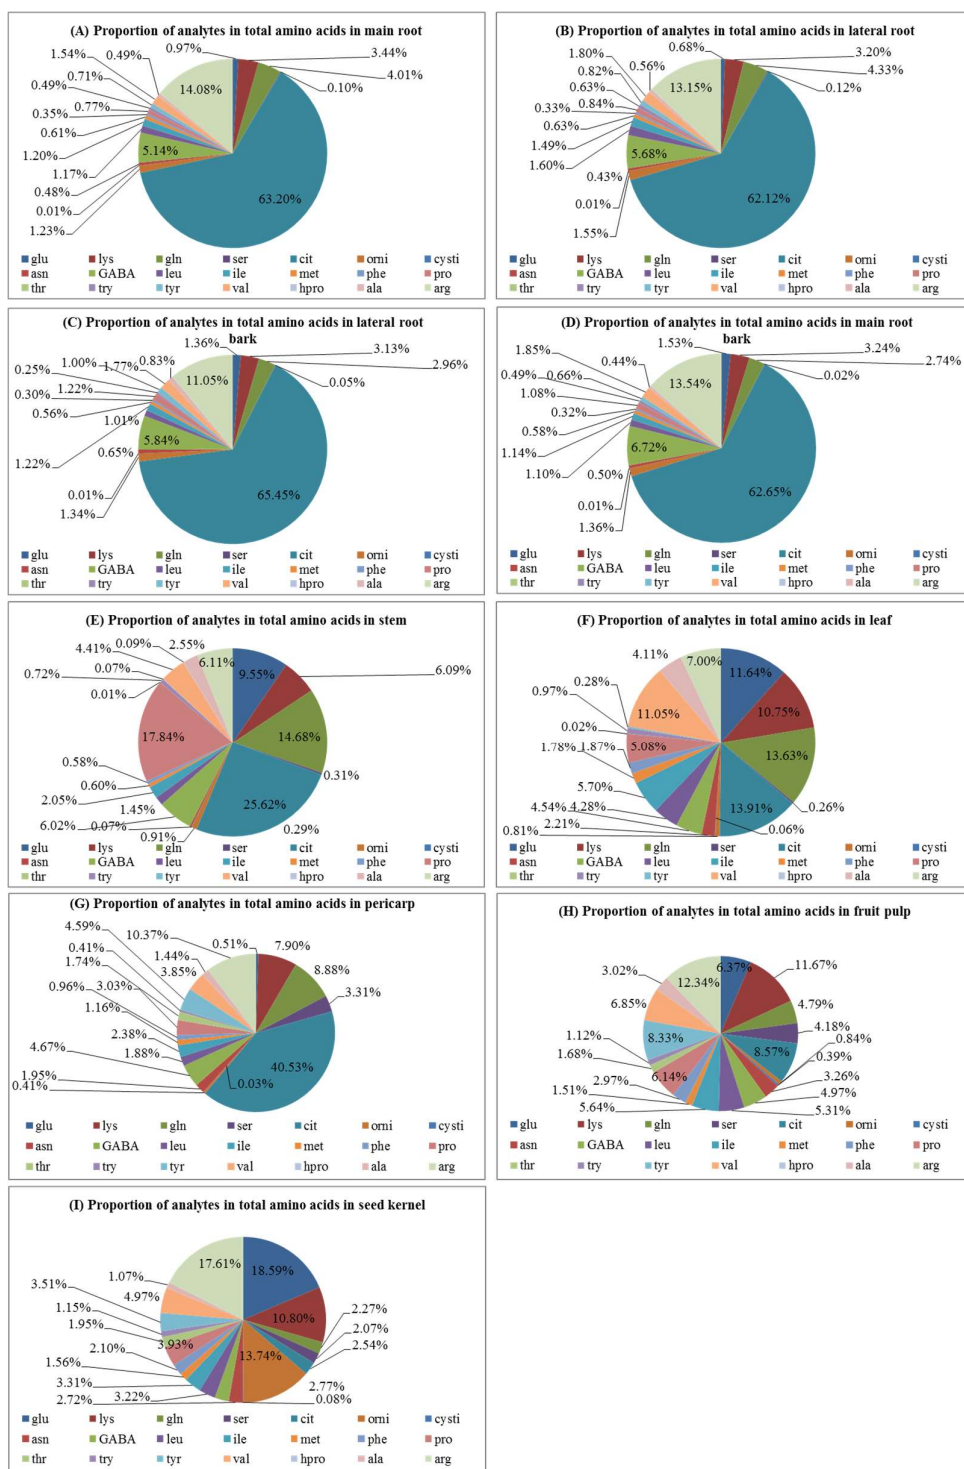

**Figure S2.** Proportion of the relatively abundant analytes in total amino acids.

Note: glu, L-glutamic acid; lys, L-lysine; gln, L-glutamine; ser, L-serine; cit, L-citrulline; orni, L-ornithine; cysti, L-cystine; asn, L-asparagine; GABA,  $\gamma$ -aminobutyric acid; leu, L-leucine; ile, iso-leucine; met, L-methionine; phe, L-phenylalanine; pro, L-proline; thr, L-threonine; try, L-tryptophan; tyr, L-tyrosine; val, L-valine; hpro, *trans*-4-hydroxy-L-proline; ala, L-alanine; arg, L-arginine

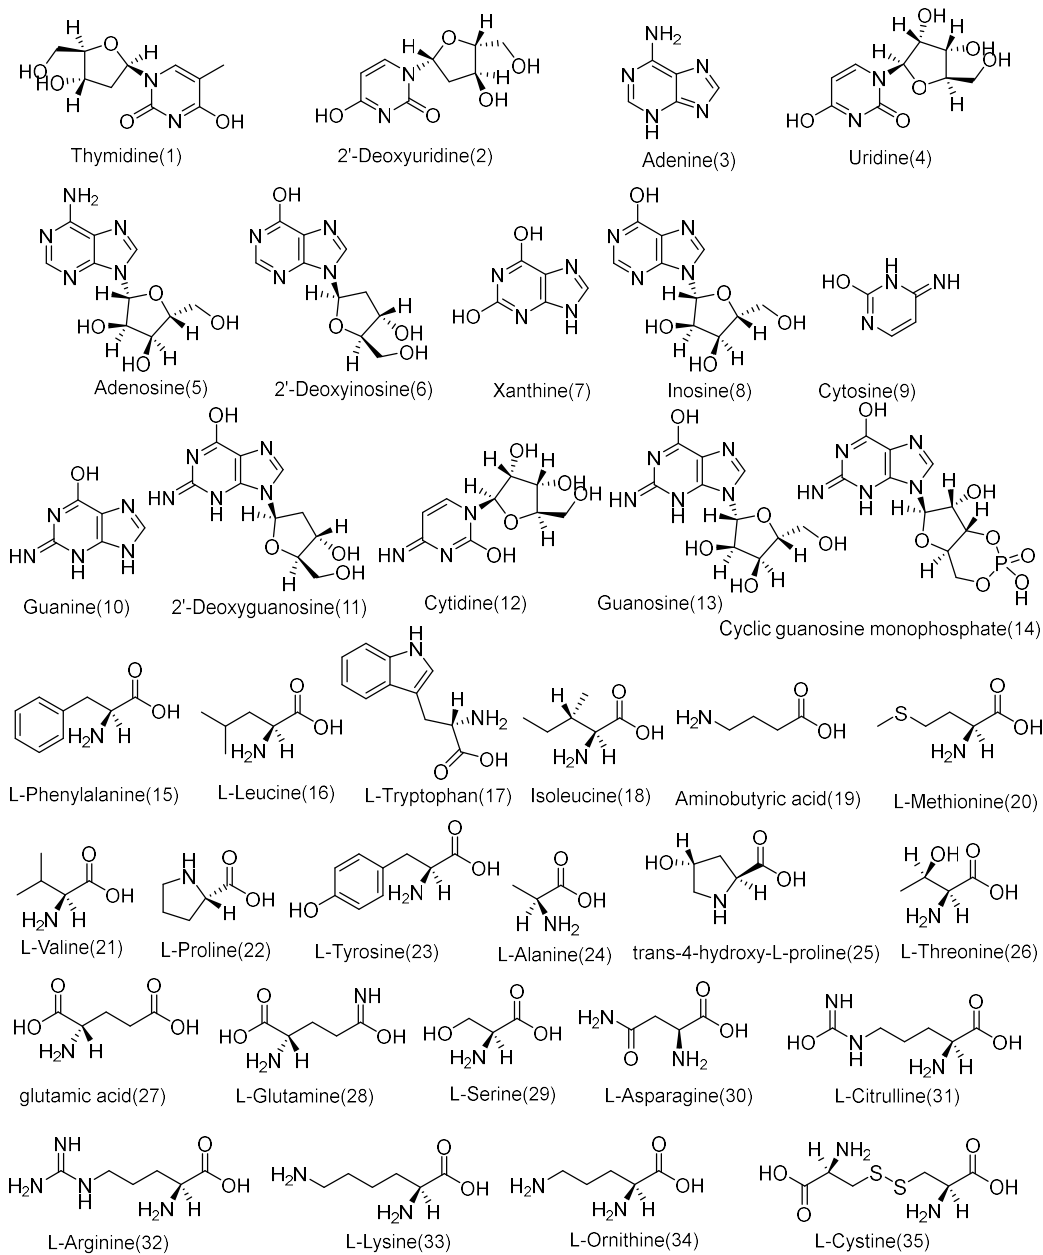

**Figure S3.** Chemical structures of investigated compounds
